# Supplementary material for: Coupling metal organic frameworks with molybdenum disulfide nanoflakes for targeted cancer theranostics
Source: Royal Society of Chemistry journal article supplement (doi:10.1039/d0bm02012e), 2020-12-27
Supplement: d0bm02012e1.pdf [file d0bm02012e1.pdf]

# Supporting Information

## **Coupling metal organic frameworks with molybdenum disulfide nanoflakes for targeted cancer theranostics**

Shuguang Yang<sup>a#</sup>, Dejian Li<sup>b#</sup>, Liang Chen<sup>a</sup>, Xiaojun Zhou<sup>a</sup>, Liwen Fu<sup>a</sup>, Yanling You<sup>a</sup>,  
Zhengwei You<sup>c</sup>, Li Kang<sup>d</sup>, Maoquan Li<sup>\*d</sup>, Chuanglong He<sup>\*a</sup>

<sup>a</sup> State Key Laboratory for Modification of Chemical Fibers and Polymer Materials,  
College of Chemistry, Chemical Engineering and Biotechnology, Donghua  
University, Shanghai 201620, China. E-mail: hcl@dhu.edu.cn.

<sup>b</sup> Department of Orthopedics, Shanghai Pudong Hospital, Fudan University Pudong  
Medical Center, Shanghai 201301, China.

<sup>c</sup> College of Materials Science and Engineering, Donghua University, Shanghai  
201620, China.

<sup>d</sup> Department of Interventional and Vascular Surgery, Shanghai Tenth People's  
Hospital, Tongji University School of Medicine, Shanghai 200072, China. E-mail:  
cjr.limaquan@vip.163.com.

### **Author Contributions**

<sup>#</sup>S.G. Yang and D.J. Li contributed equally to this work.

## Supplementary Figures:

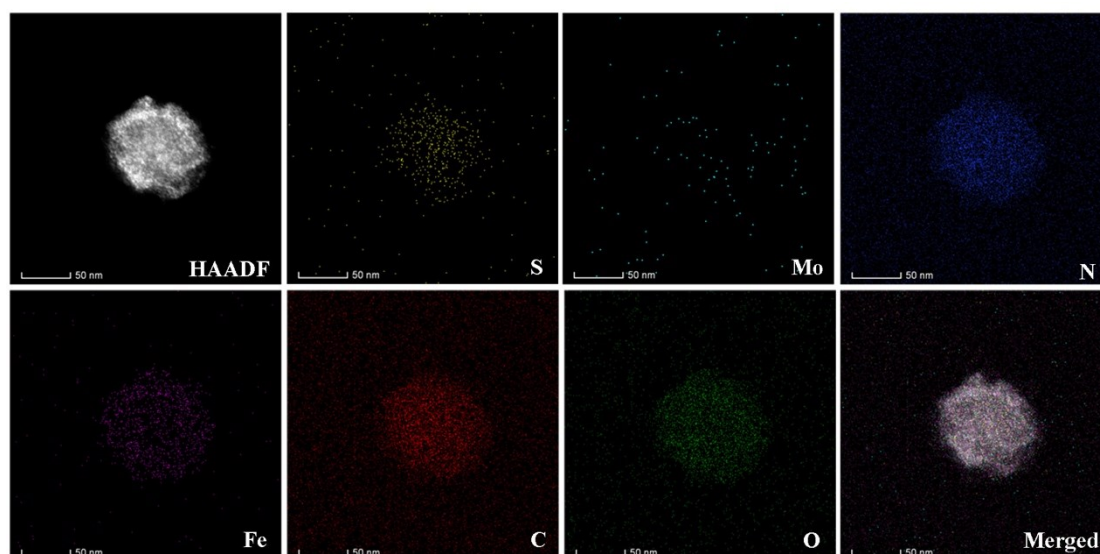

**Figure S1.** Element mapping and of prepared  $\text{MoS}_2$ -PMA.

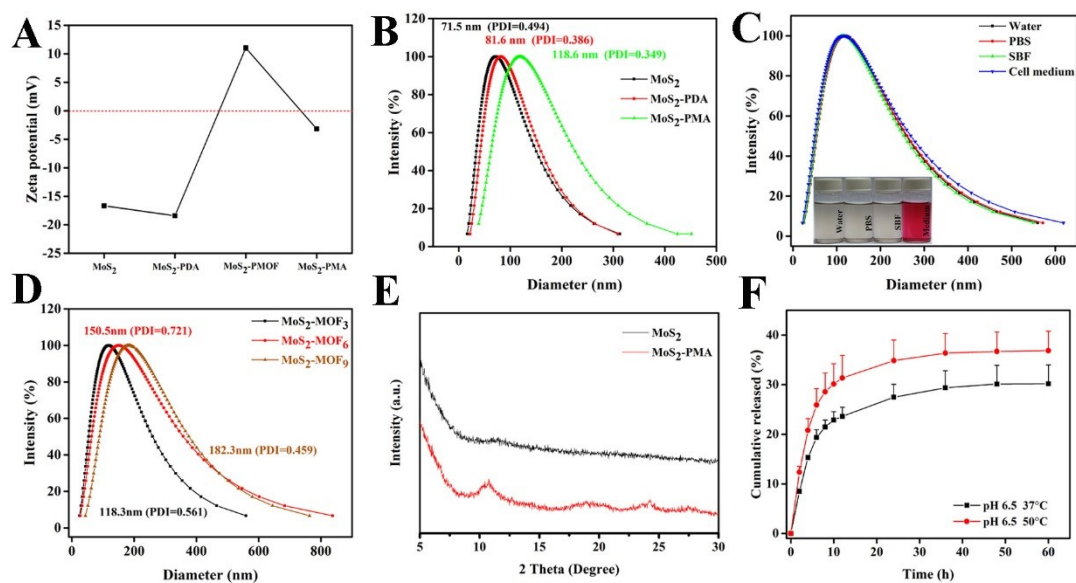

**Figure S2.** (A) Zeta potential results of different nanostructures. (B) DLS results of  $\text{MoS}_2$ ,  $\text{MoS}_2$ -PDA,  $\text{MoS}_2$ -PMA and (C)  $\text{MoS}_2$ -PMA dispersed in different media (D)  $\text{MoS}_2$ -PMOF with different MOF layer. (E) XRD patterns of  $\text{MoS}_2$  and  $\text{MoS}_2$ -PMA. (F) Drug release curves under different conditions.

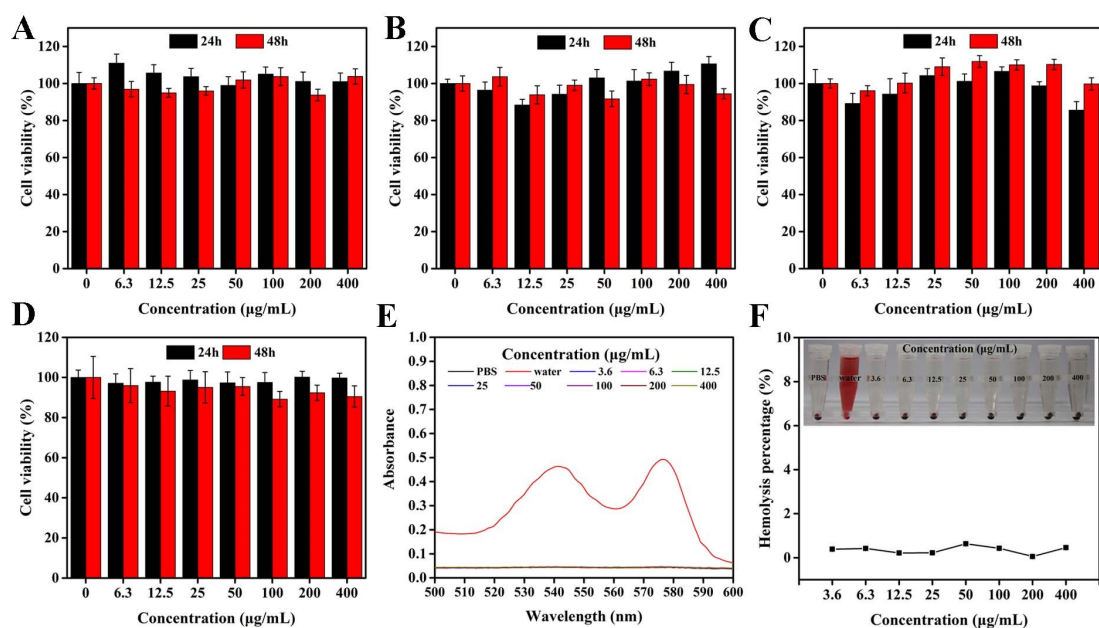

**Figure S3.** (A~D) Cell viability of, 4T1, MCF-7, HUVEC and RAW264.7 incubated with different concentrations of MoS<sub>2</sub>-PMA for 24 h and 48 h; After RBCs were incubated with MoS<sub>2</sub>-PMA with different concentrations, (E) UV-vis absorption of the supernatant and (F) Hemolytic percentage, and the embedded digital pictures were the hemolysis results after centrifugation.

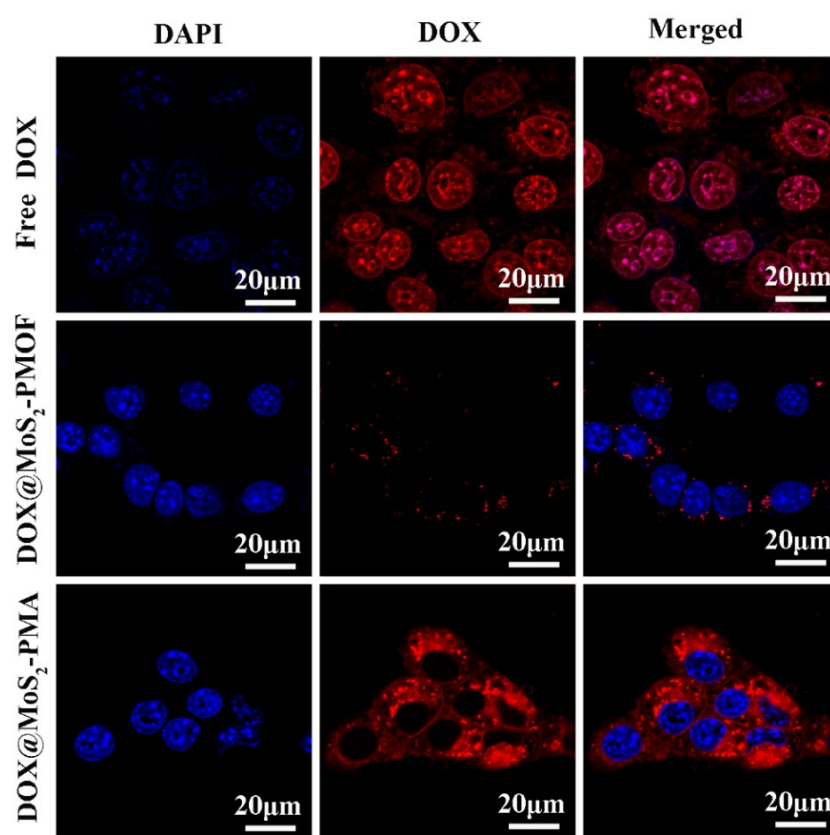

**Figure S4.** The CLSM images of 4T1 cells treated with DOX, DOX@MoS<sub>2</sub>-PMOF, and DOX@MoS<sub>2</sub>-PMA with a DOX concentration of 5 μg/mL for 4 h.

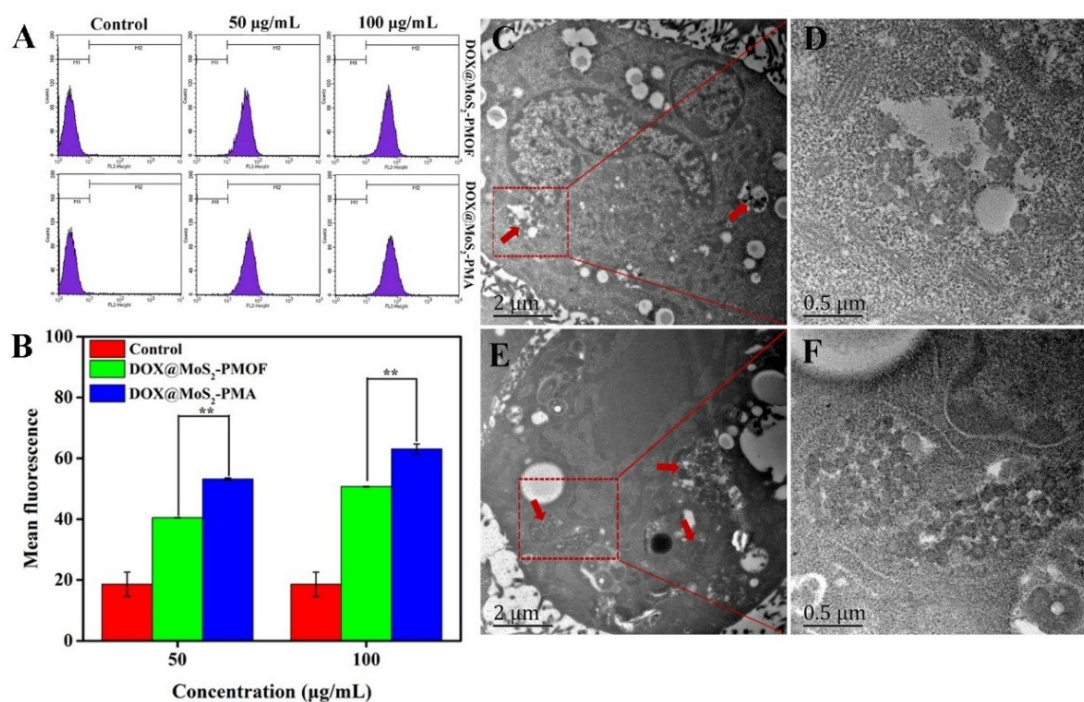

**Figure S5.** (A) Results detected by flow cytometry after cell uptake of DOX@MoS<sub>2</sub>-PMOF and DOX@MoS<sub>2</sub>-PMA; (B) Fluorescence intensity of cells after two kinds of nanoparticles incubated with cells. Bio-TEM images of 4T1 cells incubated with (C, D) MoS<sub>2</sub>-PMOF and (E, F) MoS<sub>2</sub>-PMA for 24 h.
